# Supplementary material
Source: publisher figshare collection journal article supplement (https://acs.figshare.com/ndownloader/files/26219295)
Supplement: Supplementary file 1 [file 26219295]

## Supporting information

### Highly Selective and Productive Synthesis of Carbon Dioxide-based Copolymer upon Zwitterionic Growth

Ying Wang,<sup>†</sup> Jian-Yu Zhang,<sup>‡</sup> Jia-Liang Yang,<sup>†</sup> Hao-Ke Zhang,<sup>†,‡</sup> Jiraya Kiriratnikom,<sup>†</sup> Cheng-Jian Zhang,<sup>†</sup> Kai-Luo Chen,<sup>†</sup> Xiao-Han Cao,<sup>†</sup> Lan-Fang Hu,<sup>†</sup> Xing-Hong Zhang<sup>\*,†</sup>, Ben Zhong Tang<sup>†,‡</sup>

<sup>†</sup> MOE Key Laboratory of Macromolecular Synthesis and Functionalization, Department of Polymer Science and Engineering, Zhejiang University, Hangzhou 310027, China

<sup>‡</sup> Department of Chemistry, Hong Kong Branch of Chinese National Engineering Research Centre for Tissue Restoration and Reconstruction, Institute for Advanced Study, and Department of Chemical and Biological Engineering, The Hong Kong University of Science & Technology, Clear Water Bay, Kowloon, Hong Kong, China

## Table of Contents

|                                                                                                                                                                                                                                                        |    |
|--------------------------------------------------------------------------------------------------------------------------------------------------------------------------------------------------------------------------------------------------------|----|
| <b>Materials and methods.</b>                                                                                                                                                                                                                          | 3  |
| <b>Table S1.</b> Copolymerization of CO <sub>2</sub> with PO catalyzed by TEA or TEB respectively.                                                                                                                                                     | 5  |
| <b>Figure S1.</b> <sup>1</sup> H NMR spectrum of the crude product of entry 1, Table 1.                                                                                                                                                                | 5  |
| <b>Figure S2.</b> <sup>1</sup> H NMR spectrum of the crude product of entry 2, Table 1.                                                                                                                                                                | 6  |
| <b>Figure S3.</b> <sup>1</sup> H NMR spectrum of the crude product of entry 3, Table 1.                                                                                                                                                                | 6  |
| <b>Figure S4.</b> <sup>1</sup> H NMR spectrum of the crude product of entry 4, Table 1.                                                                                                                                                                | 7  |
| <b>Figure S5.</b> <sup>1</sup> H NMR spectrum of the crude product of entry 5, Table 1.                                                                                                                                                                | 7  |
| <b>Figure S6.</b> <sup>1</sup> H NMR spectrum of the crude product of entry 6, Table 1.                                                                                                                                                                | 8  |
| <b>Figure S7.</b> <sup>1</sup> H NMR spectrum of the crude product of entry 7, Table 1.                                                                                                                                                                | 8  |
| <b>Figure S8.</b> <sup>1</sup> H NMR spectrum of the crude product of entry 8, Table 1.                                                                                                                                                                | 8  |
| <b>Figure S9.</b> <sup>1</sup> H NMR spectrum of the crude product of entry 9, Table 1.                                                                                                                                                                | 9  |
| <b>Figure S10.</b> <sup>1</sup> H NMR spectrum of the crude product of entry 10, Table 1.                                                                                                                                                              | 10 |
| <b>Figure S11.</b> <sup>1</sup> H NMR spectrum of the crude product of entry 11, Table 1.                                                                                                                                                              | 10 |
| <b>Figure S12.</b> (1) <sup>1</sup> H NMR spectrum of the crude product of entry 1 Table 2; (2) <sup>1</sup> H NMR spectrum of the purified product of entry 1, Table 2; (3) <sup>13</sup> C NMR spectrum of the purified product of entry 1, Table 2. | 11 |
| <b>Figure S13.</b> (1) <sup>1</sup> H NMR spectrum of the crude product of entry 2 Table 2; (2) <sup>1</sup> H NMR spectrum of the purified product of entry 2, Table 2; (3) <sup>13</sup> C NMR spectrum of the purified product of entry 2, Table 2. | 12 |
| <b>Figure S14.</b> (1) <sup>1</sup> H NMR spectrum of the crude product of entry 3 Table 2; (2) <sup>1</sup> H NMR spectrum of the purified product of entry 3, Table 2; (3) <sup>13</sup> C NMR spectrum of the purified product of entry 3, Table 2. | 13 |
| <b>Figure S15.</b> <sup>1</sup> H NMR spectrum of the crude product of entry 4 Table 2.                                                                                                                                                                | 14 |
| <b>Figure S16.</b> <sup>1</sup> H NMR spectrum of the crude product of entry 5 Table 2.                                                                                                                                                                | 14 |
| <b>Figure S17.</b> <sup>1</sup> H NMR spectrum of the crude product of entry 6 Table 2.                                                                                                                                                                | 15 |
| <b>Figure S18.</b> In situ infrared profiles of –OC(O)O– linkages in PPC catalyzed by TEED/TEB at 60°C.                                                                                                                                                | 15 |
| <b>Figure S19.</b> Quantitative <sup>13</sup> C NMR spectrum (CDCl <sub>3</sub> ) of the purified CO <sub>2</sub> /PO copolymer catalyzed by 1) TEA-TBB; 2) TEED-TEB; 3) TEED-TBB.                                                                     | 16 |
| <b>Figure S20.</b> Free energies associated with the chain initiation and growth of the copolymerization of CO <sub>2</sub> with PO by the TEB/TEA pair by the unfavourable routes.                                                                    | 16 |
| <b>Figure S22.</b> <sup>1</sup> H NMR spectra (CDCl <sub>3</sub> ) of a) TEA, b) TEA/TEB (1:1) pair.                                                                                                                                                   | 17 |
| <b>Figure S23.</b> a) MALDI-TOF MS spectrum of PPC catalyzed by TEB/TEA (without termination). b) The fitting relationship of Mn of PPC vs. the numbers of the repeating unit.                                                                         | 18 |
| <b>Figure S24.</b> The elemental analysis result of PPC catalyzed by TEB/TEA ( <i>M<sub>n</sub></i> = 2532 g/mol, terminated by dilute 1.0 M HCl in ethanol).                                                                                          | 18 |

## **Materials and methods.**

### **Materials.**

Unless otherwise specified, all syntheses and manipulations were carried out on a double-manifold Schlenk vacuum line under nitrogen atmosphere or in a nitrogen-filled glovebox. Triethylamine (TEA) and N,N,N',N'-Tetramethylethylenediamine (TMED) was bought from J&K Chemical. N,N,N',N'-tetraethyl ethylenediamine (TEED) was purchased from Energy Chemical. All tertiary amines were purified by distillation after stirring with calcium hydride for 3 days in nitrogen. Triethyl borane (TEB) in tetrahydrofuran solution (1.0 mol/L) and tributyl borane (TBB) in tetrahydrofuran solution (1.0mol/L) was bought from Sigma-Aldrich and used without further purifications. Propylene oxide (PO) was purified by distillation after stirring with calcium hydride for 3 days. Carbon dioxide (> 99.99%) was used as received. Following purification, materials were stored in a nitrogen-filled glovebox prior to use unless otherwise specified.

### **Methods.**

$^1\text{H}$  and  $^{13}\text{C}$  NMR spectra were performed on a Bruker Advance DMX 400 MHz in  $\text{CDCl}_3$ . And chemical shift values were referenced to  $\text{CHCl}_3$  at 7.26 ppm for  $^1\text{H}$  NMR and 77.16 ppm for  $^{13}\text{C}$  NMR. The number-average molecular weight ( $M_n$ ) and molecular weight distribution ( $\text{Đ} = M_w/M_n$ ) of the resultant copolymers were determined with a PL-GPC220 chromatograph (Polymer Laboratories) equipped with an HP 1100 pump from Agilent Technologies. The GPC columns were eluted with THF with 1.0

mL/min at 40°C. The sample concentration was 0.4 wt %, and the injection volume was 50 µL. Calibration was performed using monodisperse polystyrene standards. Matrix-assisted laser desorption/ionization time-of-flight (MALDI-TOF) mass spectrometric measurements were performed on a Bruker Ultraflex MALDI TOF mass spectrometer, equipped with a nitrogen laser delivering 3 ns laser pulses at 337 nm. trans-2-[3-(4-tert-Butylphenyl)-2-methyl-2-propenylidene]malononitrile (DCTB, 99%, Alfa) was used as the matrix.

### **Representative procedure for copolymerization reactions.**

A 10mL autoclave with magnetic stirrer was dried in an oven at 120°C overnight, then immediately placed into the glove box chamber. After keeping under vacuum for 1-2 h, the reaction vessel was put into the glove box under nitrogen atmosphere. The copolymerization of CO<sub>2</sub> with PO described below is taken from entry 2 in Table 1 as an example. triethylamine (TEA, 20 µl, 0.143 mmol) was firstly added into the reactor. Afterwards, propylene (PO, 1ml, 14.3 mmol) and triethyl borane (TEB, 143 µL, 0.143 mmol), was added into the autoclave respectively. The reactor was sealed and taken out from the glove box and charged with 1.26 g CO<sub>2</sub> (CO<sub>2</sub> : epoxide = 2:1, molar ratio, 2 MPa). The copolymerization was carried out at 60°C for 4 h. In the first 5 minutes of the reaction, the pressure was increased to 2.7 MPa. During the copolymerization process, the pressure drops gradually. When PO conversion was up to 80%, the pressure finally drops to around 2.1 MPa. At the end of the polymerization, the autoclave was cooled in ice-water bath and return to room temperature with decreased pressure to 1.8MPa. The unreacted CO<sub>2</sub> was slowly released. A spot of crude product was taken

for the determination of PO conversion and the molar ratio of copolymer/cyclic products by  $^1\text{H}$  NMR spectrum. The crude product was quenched with HCl in ethanol (1mol/L). Next, the polymer was dissolved with  $\text{CH}_2\text{Cl}_2$  and then precipitated in ethanol. The final product was dried in vacuum at  $50^\circ\text{C}$  until a constant weight.

**Table S1.** Copolymerization of  $\text{CO}_2$  with PO catalyzed by TEA or TEB respectively.<sup>[a]</sup>

| Entr | LA  | LB  | LA/LB/PO | t/h | Conv.              | PPC                       | $F_{\text{CO}_2}$  | $M_n$                   | PDI                        |
|------|-----|-----|----------|-----|--------------------|---------------------------|--------------------|-------------------------|----------------------------|
| y    |     |     |          |     | [%] <sup>[b]</sup> | Selec. [%] <sup>[b]</sup> | [%] <sup>[c]</sup> | [kg/mol] <sup>[d]</sup> | $[M_w/M_n]$ <sup>[d]</sup> |
| 1    | -   | TEA | 0:1:100  | 4   | -                  | -                         | -                  | -                       | -                          |
| 2    | TEB | -   | 1:0:100  | 4   | -                  | -                         | -                  | -                       | -                          |

<sup>[a]</sup> The reactions were performed in bulk in a 10 ml autoclave,  $60^\circ\text{C}$ ,  $[\text{CO}_2]:[\text{PO}]=2:1$ .

<sup>[b]</sup> Determined by  $^1\text{H}$  NMR spectroscopy of crude product. <sup>[c]</sup> Determined by  $^1\text{H}$  NMR spectroscopy of the purified product. <sup>[d]</sup> Determined by gel permeation chromatography (GPC) in THF, calibrated with polystyrene standards.

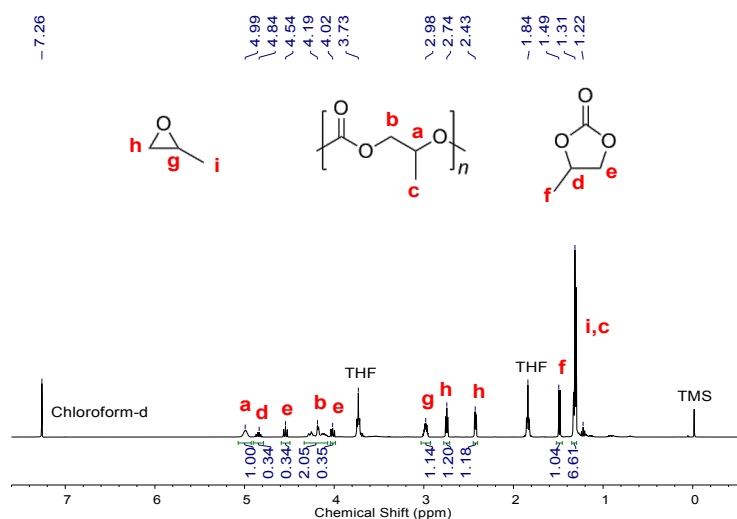

**Figure S1.**  $^1\text{H}$  NMR spectrum of the crude product of entry 1, Table 1.

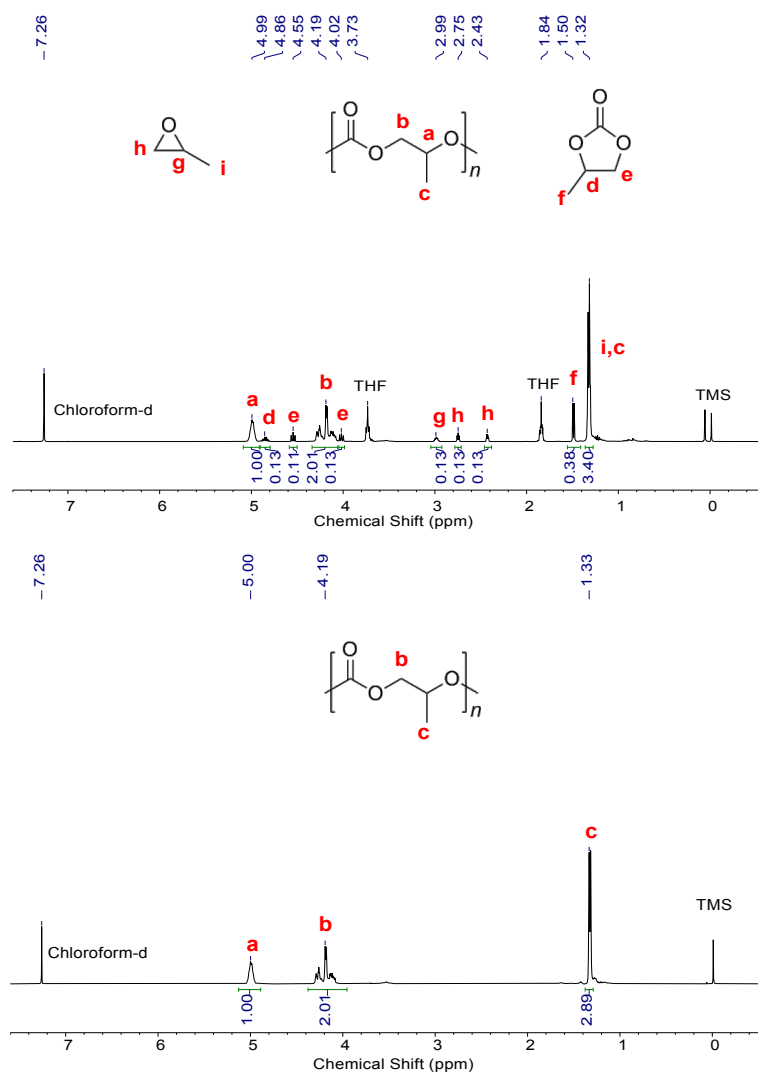

**Figure S2.**  $^1\text{H}$  NMR spectrum of the crude product of entry 2, Table 1.

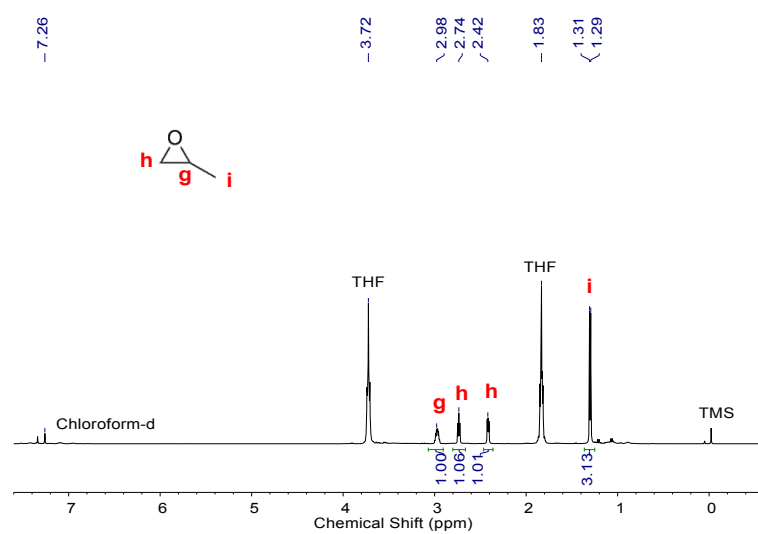

**Figure S3.**  $^1\text{H}$  NMR spectrum of the crude product of entry 3, Table 1.

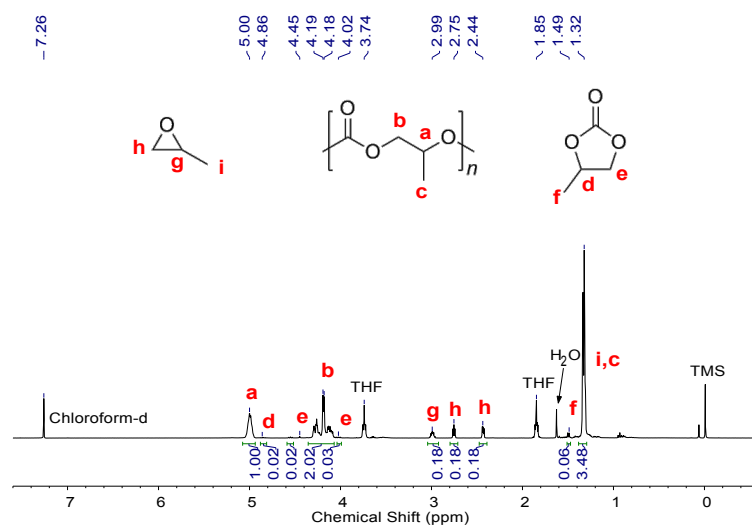

Figure S4.  $^1\text{H}$  NMR spectrum of the crude product of entry 4, Table 1.

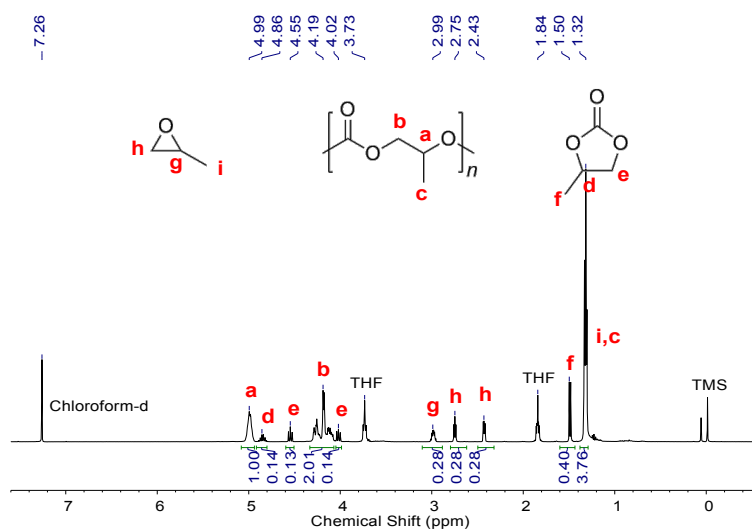

Figure S5.  $^1\text{H}$  NMR spectrum of the crude product of entry 5, Table 1.

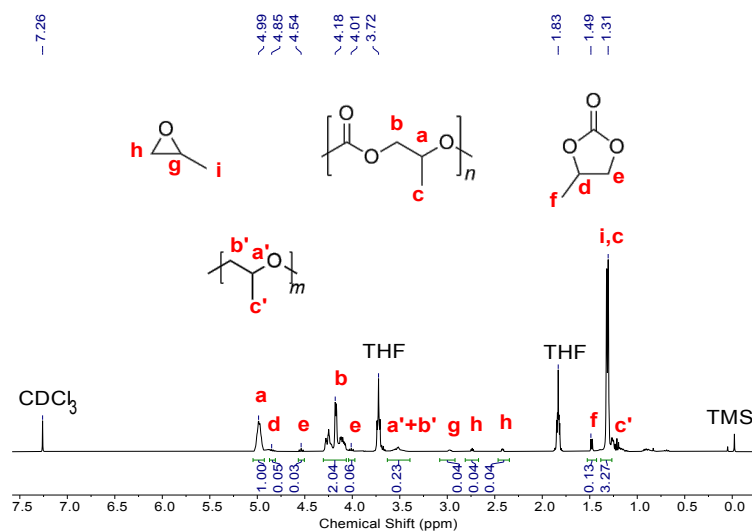

**Figure S6.**  $^1\text{H}$  NMR spectrum of the crude product of entry 6, Table 1.

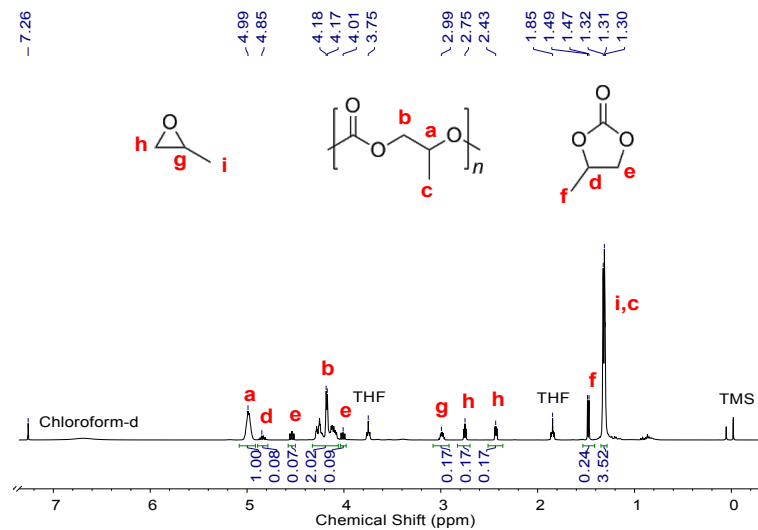

**Figure S7.**  $^1\text{H}$  NMR spectrum of the crude product of entry 7, Table 1.

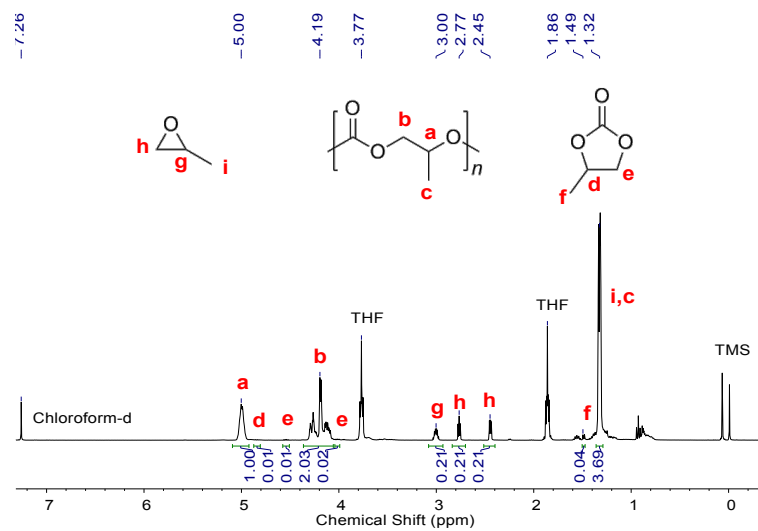

**Figure S8.**  $^1\text{H}$  NMR spectrum of the crude product of entry 8, Table 1.



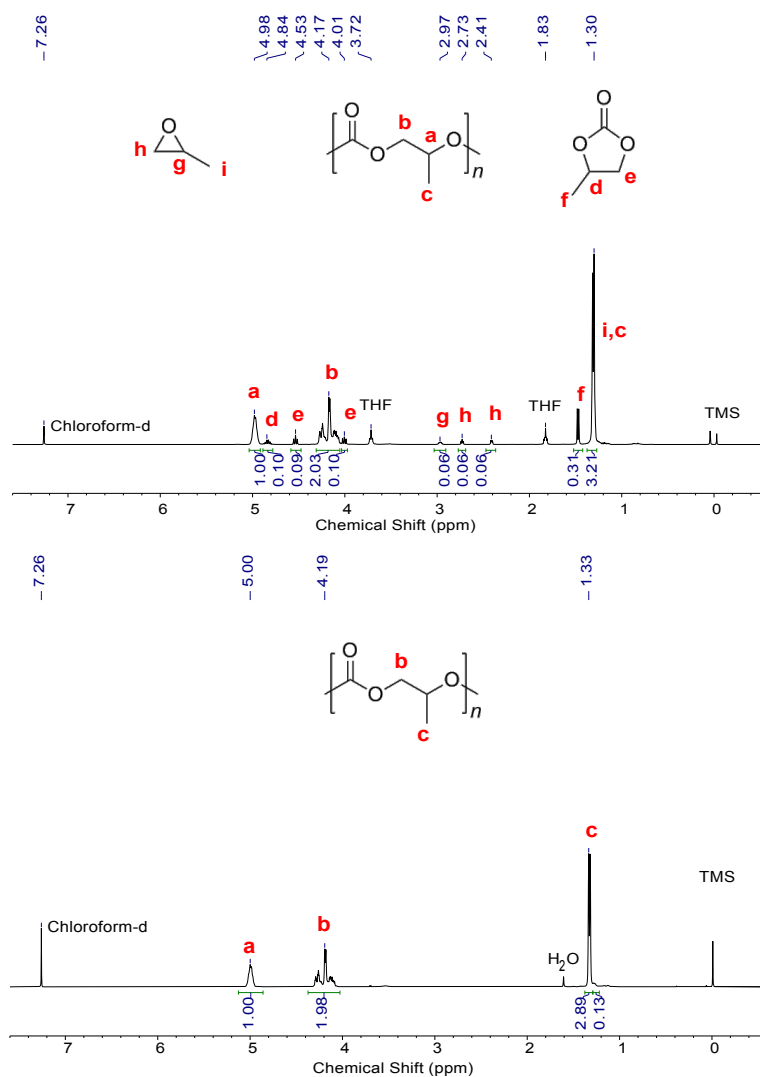

**Figure S9.** <sup>1</sup>H NMR spectrum of the crude product of entry 9, Table 1.

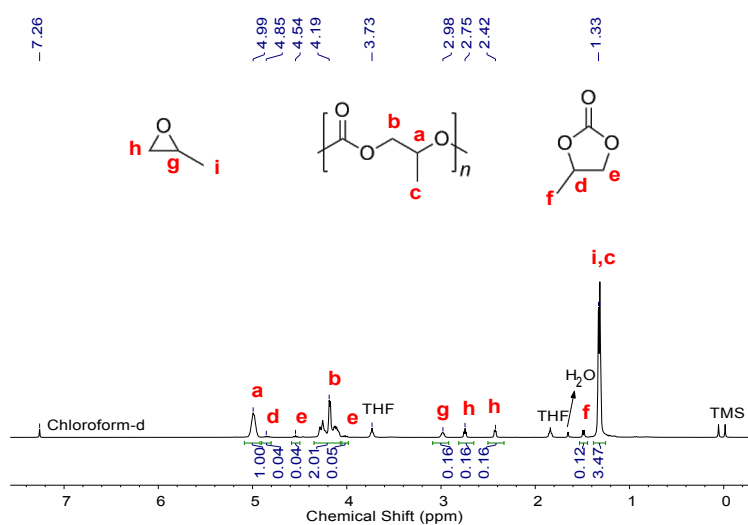

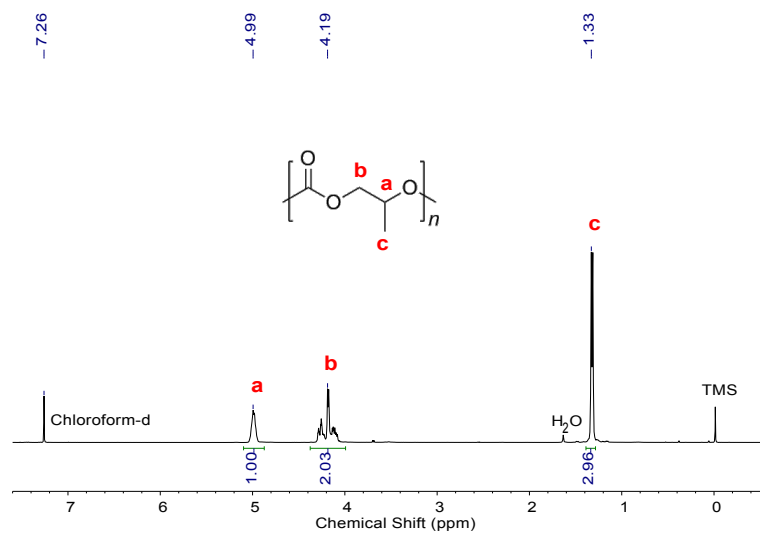

**Figure S10.**  $^1\text{H}$  NMR spectrum of the crude product of entry 10, Table 1.

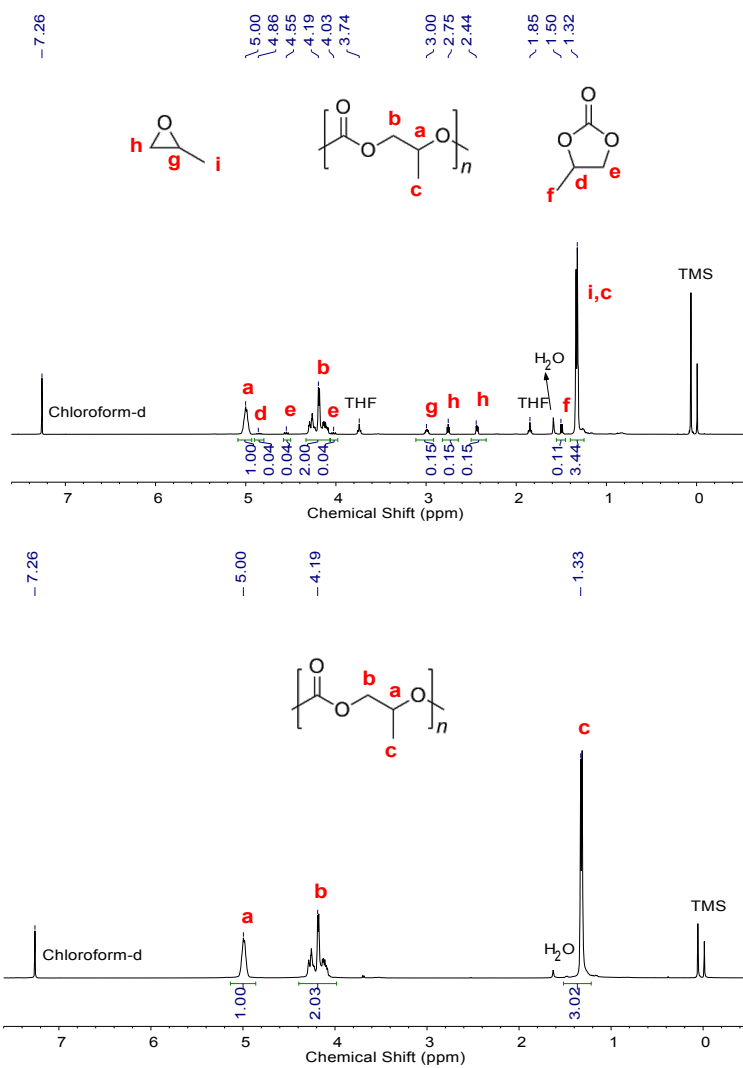

**Figure S11.**  $^1\text{H}$  NMR spectrum of the crude product of entry 11, Table 1.

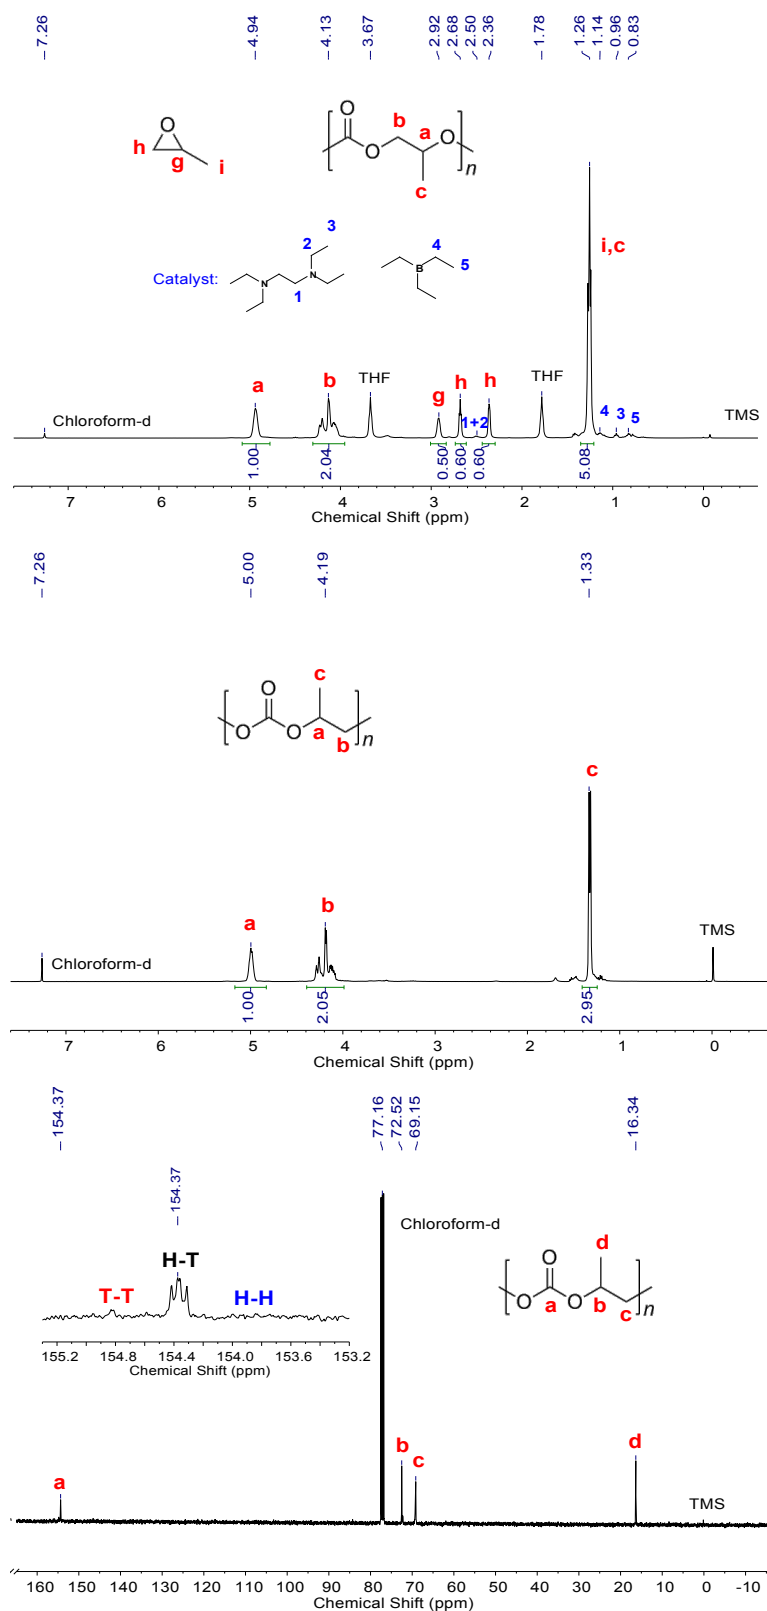

**Figure S12.** (1) <sup>1</sup>H NMR spectrum of the crude product of entry 1 Table 2; (2) <sup>1</sup>H NMR spectrum of the purified product of entry 1, Table 2; (3) <sup>13</sup>C NMR spectrum of the purified product of entry 1, Table 2.

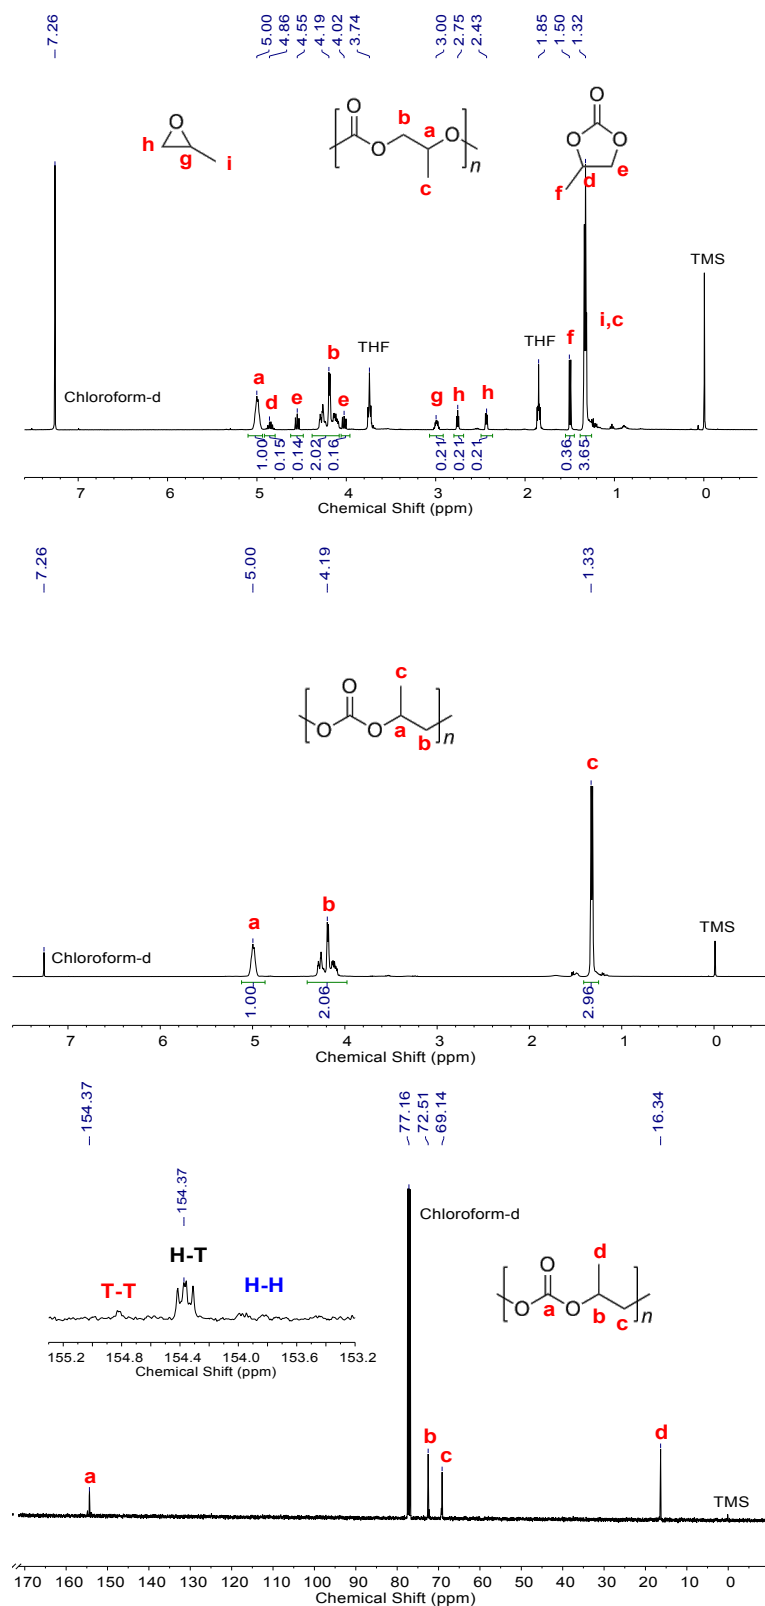

**Figure S13.** (1)  $^1\text{H}$  NMR spectrum of the crude product of entry 2 Table 2; (2)  $^1\text{H}$  NMR spectrum of the purified product of entry 2, Table 2; (3)  $^{13}\text{C}$  NMR spectrum of the purified product of entry 2, Table 2.



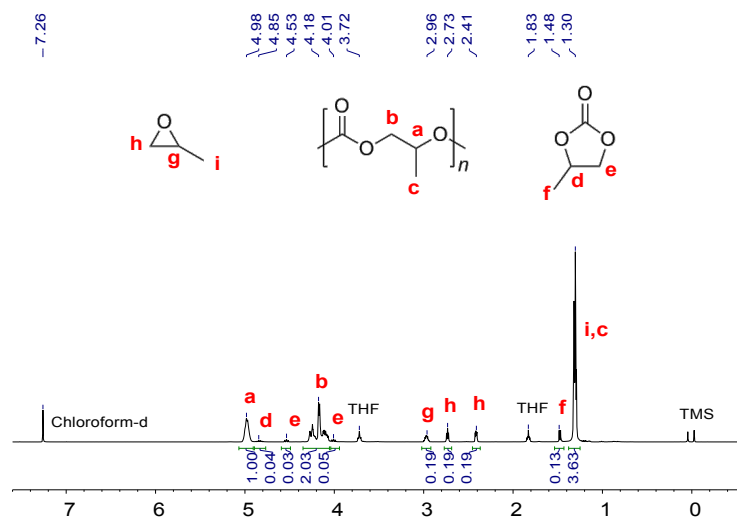

Figure S15.  $^1\text{H}$  NMR spectrum of the crude product of entry 4 Table 2.

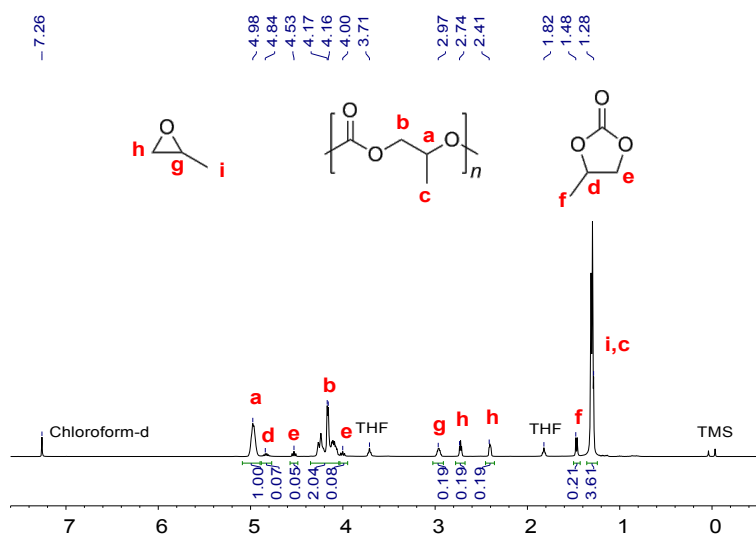

Figure S16.  $^1\text{H}$  NMR spectrum of the crude product of entry 5 Table 2.

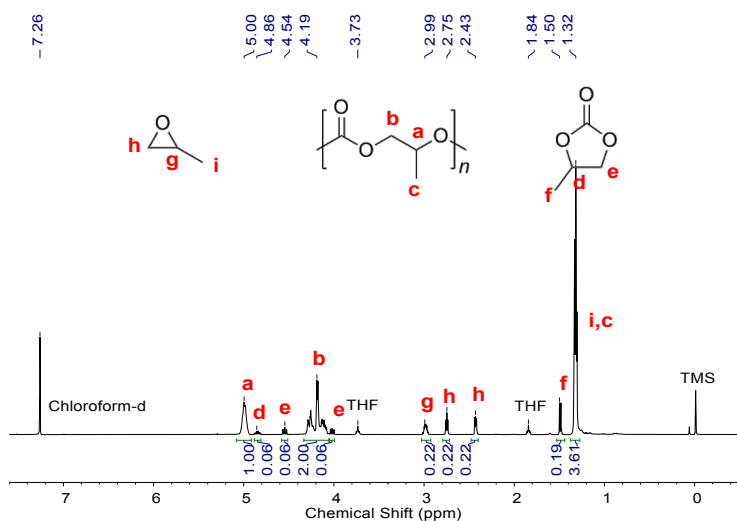

**Figure S17.**  $^1\text{H}$  NMR spectrum of the crude product of entry 6 Table 2.

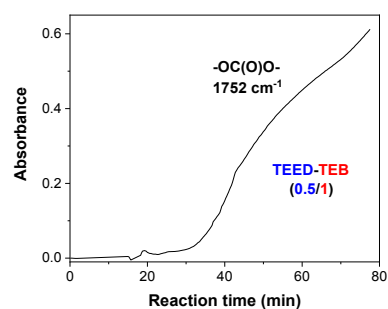

**Figure S18.** In situ infrared profiles of  $-\text{OC}(\text{O})\text{O}-$  linkages in PPC catalyzed by TEED/TEB at  $60^\circ\text{C}$ .

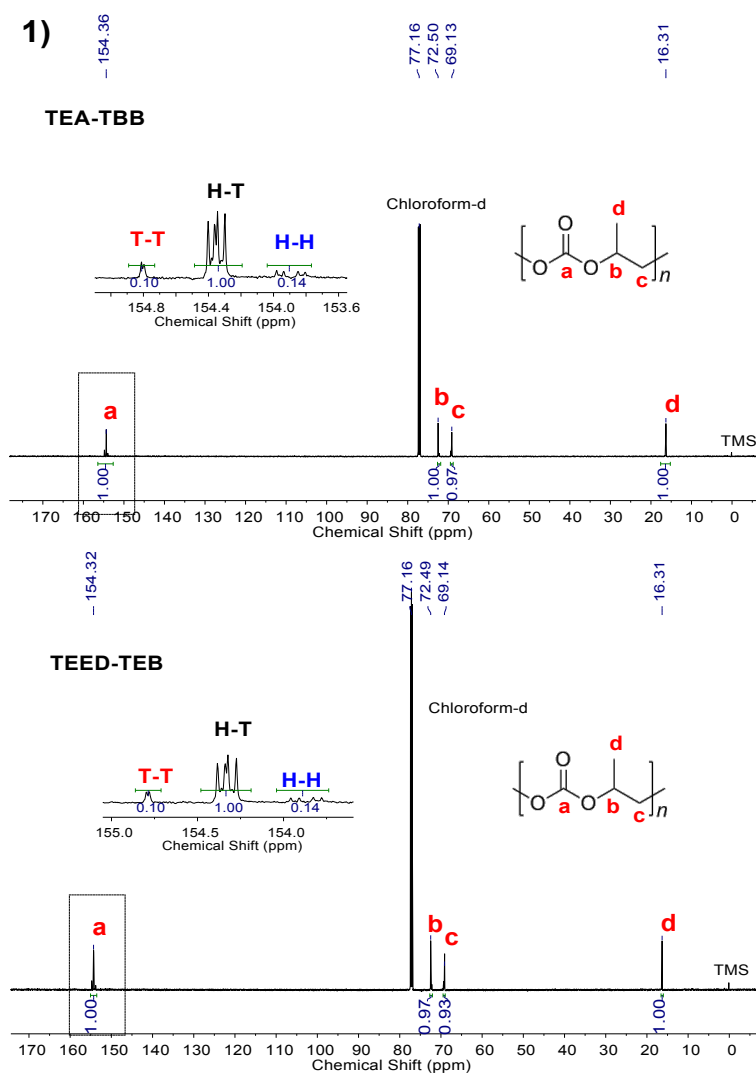

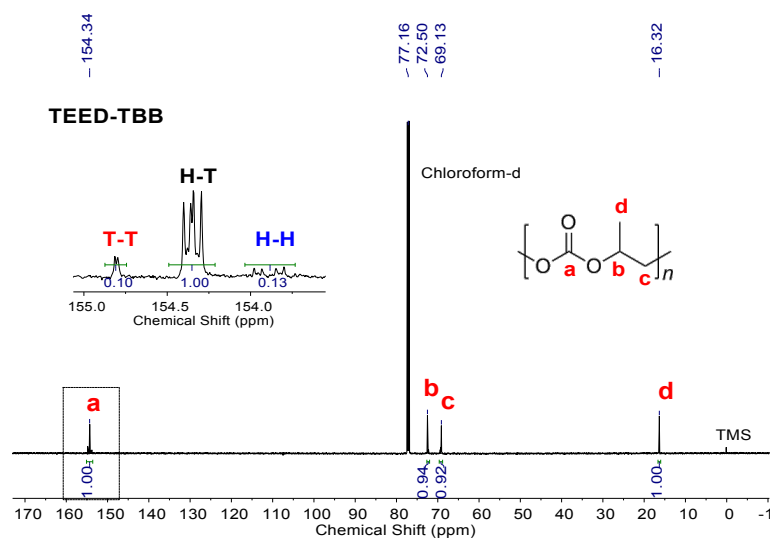

**Figure S19.** Quantitative  $^{13}\text{C}$  NMR spectrum ( $\text{CDCl}_3$ ) of the purified  $\text{CO}_2/\text{PO}$  copolymer catalyzed by 1) TEA-TBB; 2) TEED-TEB; 3) TEED-TBB.

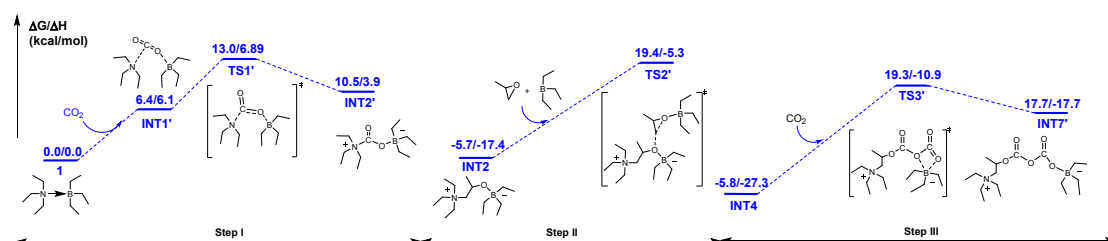

**Figure S20.** Free energies associated with the chain initiation and growth of the copolymerization of  $\text{CO}_2$  with PO by the TEB/TEA pair by the unfavourable routes.



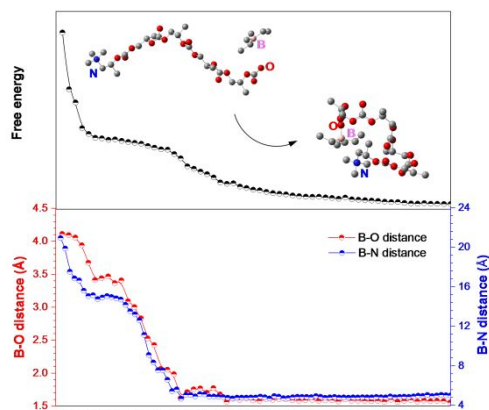

**Figure S21.** The free energy and corresponding B-O and B-N distance during changes of the conformation for CO<sub>2</sub>/PO copolymer with 5 repeating units. Calculated by the method of m062x/6-31g(d,p), Gaussian 09 program.

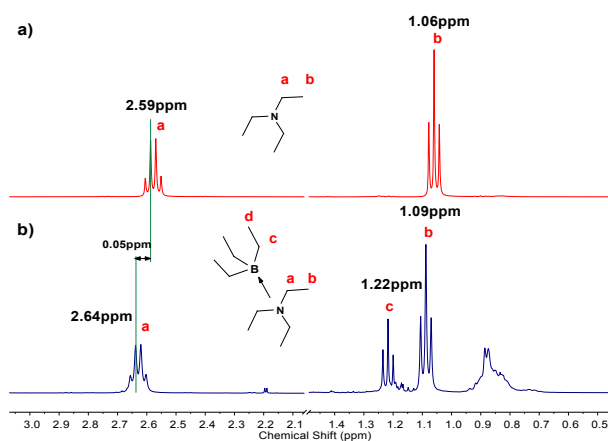

**Figure S22.** <sup>1</sup>H NMR spectra (CDCl<sub>3</sub>) of a) TEA, b) TEA/TEB (1:1) pair.

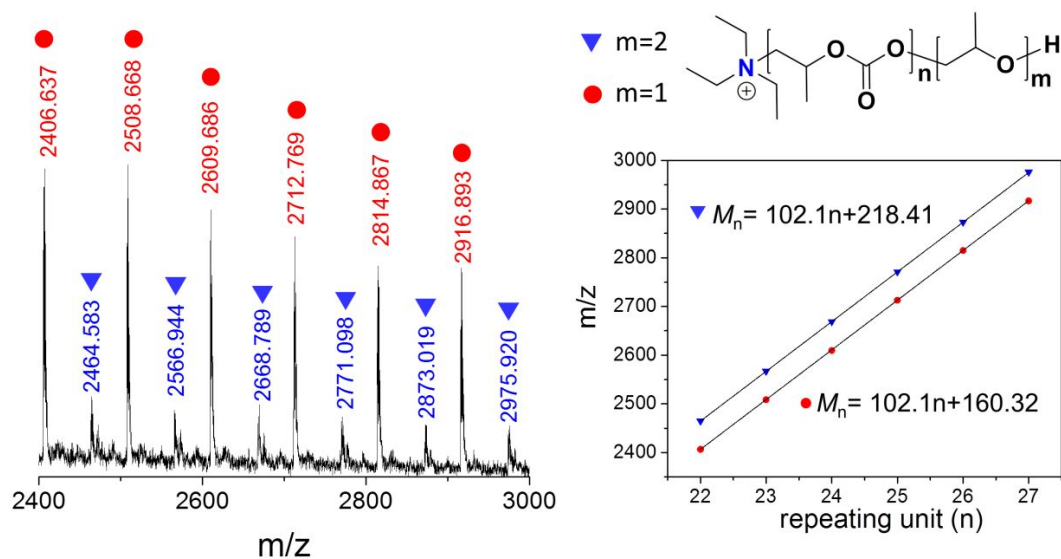

**Figure S23.** a) MALDI-TOF MS spectrum of PPC catalyzed by TEB/TEA (without termination). b) The fitting relationship of  $M_n$  of PPC vs. the numbers of the repeating unit.

Document: Untitled (VarioMICRO) from: --.-- (modified)

Department of Chemistry, Zhejiang University  
varioMICRO CHN  
2020-12-31

#### Text report

|    | Name         | Method     | Weight [mg] | N Area | C Area | H Area | N [%] | C [%] | H [%] |
|----|--------------|------------|-------------|--------|--------|--------|-------|-------|-------|
| 25 | wy20201225-2 | 2mgChem70s | 2.1220      | 330    | 20 941 | 9 805  | 0.50  | 47.00 | 6.47  |
| 26 | wy20201225-2 | 2mgChem70s | 1.7750      | 263    | 17 513 | 8 357  | 0.48  | 46.97 | 6.55  |

Name: eassuperuser, Access: VarioMICRO superuser

2020-12-31 14:51:47

varioMICRO V1.9.7 2010-9-30, CHN Mode, Ser. No.: 15105051  
Elementar Analysensysteme GmbH

Page 1 (of 1)

**Figure S24.** The elemental analysis result of PPC catalyzed by TEB/TEA ( $M_n = 2500$  g/mol, terminated by dilute 1.0 M HCl in ethanol).
